# Supplementary material for: Effect of the Composition of Leuzea and Cranberry Meal Extracts on Metabolic Processes in Norm and Pathology
Source: Pharmaceuticals (Basel). 2023 May 19;16(5):768. doi: 10.3390/ph16050768 (PMC10221024; doi:10.3390/ph16050768)
Supplement: Supplementary file 1 [file pharmaceuticals-16-00768-s001.zip › File S2.pdf]

## 1. The first group of samples - ursolic acid and cranberry meal

### 1.1 Ursolic acid sample C<sub>30</sub>H<sub>48</sub>O<sub>3</sub> (anion mass C<sub>30</sub>H<sub>47</sub>O<sub>3</sub><sup>-</sup> 455.353)

Mass spectra were recorded on a solution of 1 mg/cm<sup>3</sup> of the sample in ethyl alcohol, direct input mass spectrometry (without chromatographic separation) on a Bruker mi-crOTOFQ instrument, electrospray ionization (ESI) method, negative ion registration mode, calibration mixture - arginine solution in acidified formic acid with bidistilled water.

General view of the mass spectrum in the range 150-800

daltons:

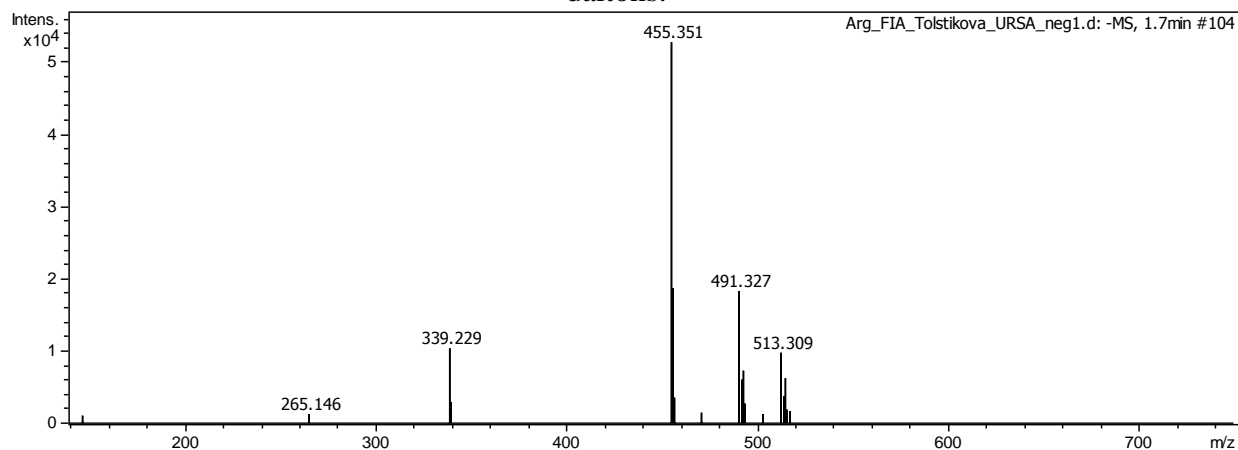

We can see that the negative ions have a peak with  $m/z=455$  - this is the expected peak of the anion C<sub>30</sub>H<sub>47</sub>O<sub>3</sub><sup>-</sup> and, additionally, there are isotopic peaks of the cluster.

The mass spectrum is around 455 daltons:

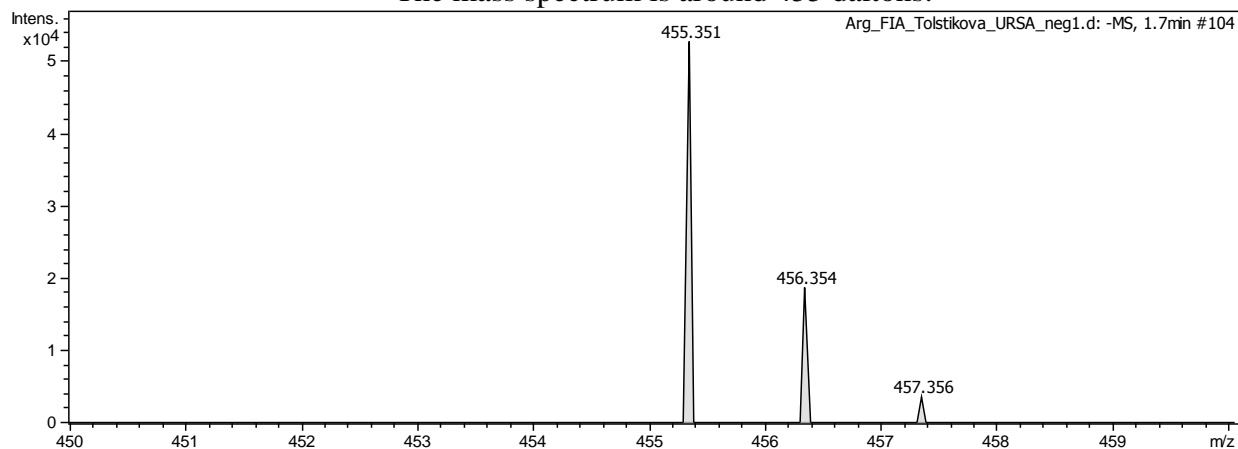

Simulation with C<sub>30</sub>H<sub>47</sub>O<sub>3</sub><sup>-</sup>,  $m/z=455$ , recorded mass spectrum above, simulation below:

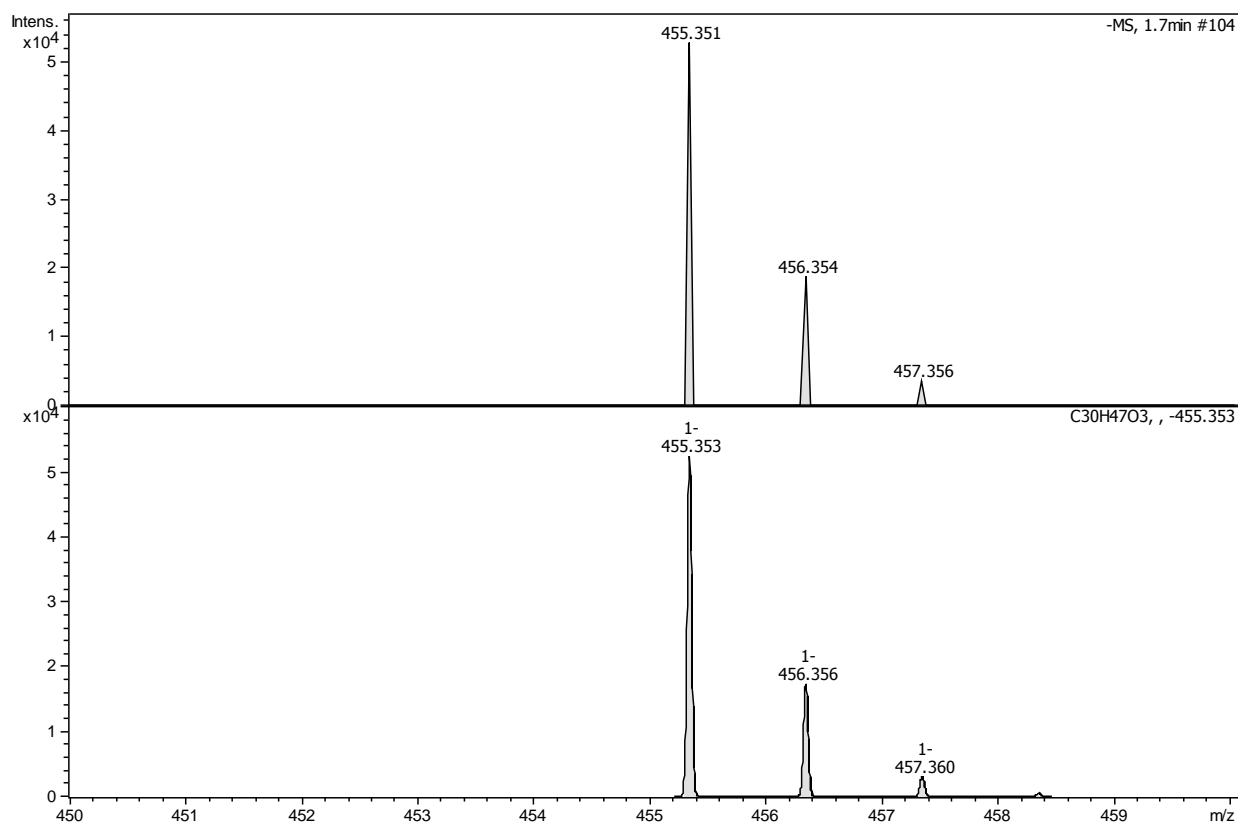

Thus: with an error of 0.002 daltons (4.4 m.d.) this is the structure, according to the isotopic distribution also looks like it.

## 1.2. Cranberry meal sample

Mass spectra were recorded on a solution of 1 mg/cm<sup>3</sup> of the sample in ethyl alcohol, direct input mass spectrometry (without chromatographic separation) on a Bruker mi-crOTOFQ instrument, electrospray ionization (ESI) method, negative ion registration mode, calibration mixture - arginine solution in acidified formic acid with bidistilled water.

General view of the mass spectrum in the 300-750 daltons range:

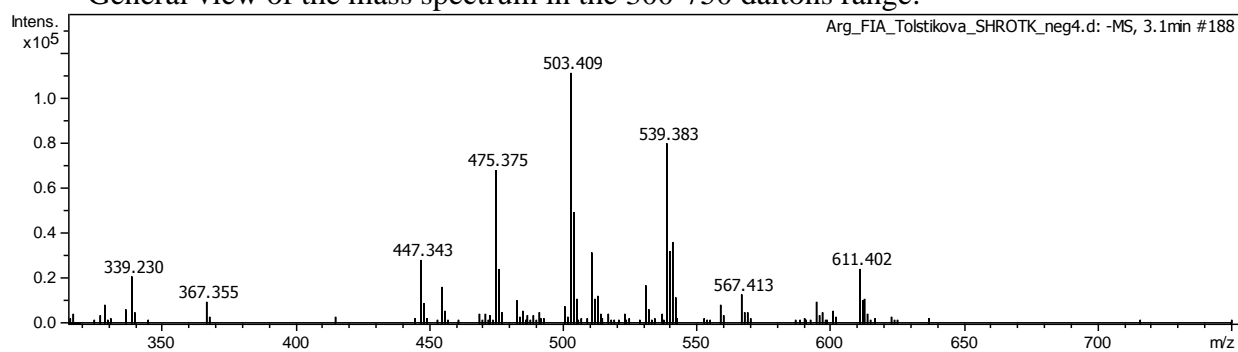

We can see that the negative ions have a peak with  $m/z=455$  - this is the expected peak of the anion  $C_{30}H_{47}O_3^-$  - and, additionally, there are isotopic peaks of the cluster.

Mass spectrum around 455 daltons:

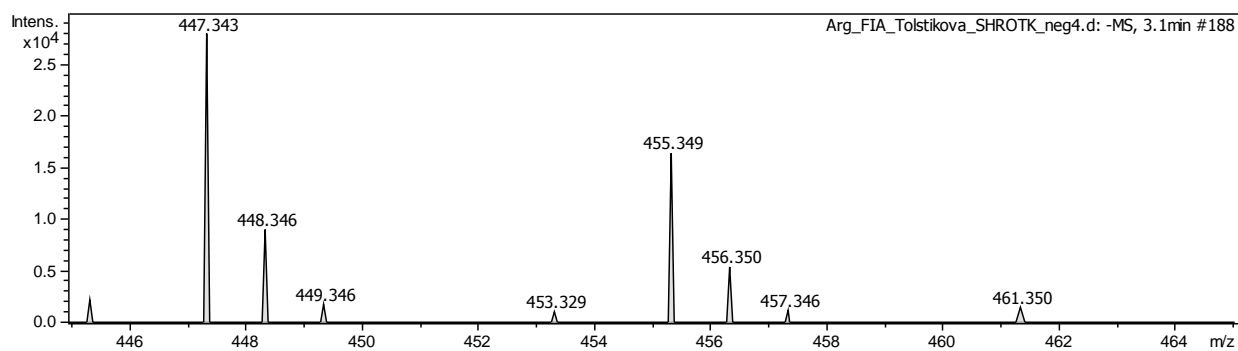

Simulation with  $C_{30}H_{47}O_3^-$ ,  $m/z=455$ , recorded mass spectrum above, simulation below:

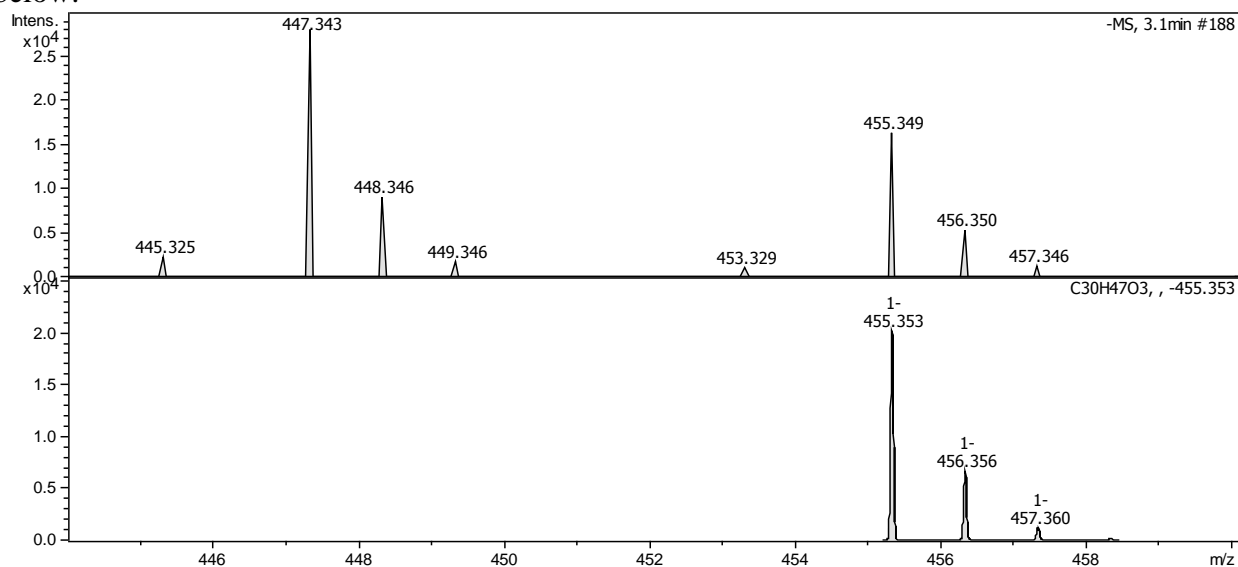

So: with an error of about 0.004 daltons (8.8 m.d.) this is the structure, according to the isotopic distribution also looks like it.

## 2. The second group of samples - ecdystene and leuzea extract

### 2.1 Sample of ecdystene $C_{27}H_{44}O_7$ (cation mass $(M+H)^+$ $C_{27}H_{45}O_7^+$ 481.317)

Mass spectra were recorded on a solution of 1 mg/cm<sup>3</sup> of the sample in ethyl alcohol, direct input mass spectrometry (without chromatographic separation) on a Bruker mi-crOTOFQ instrument, electrospray ionization (ESI) method, negative ion registration mode, calibration mixture - arginine solution in acidified formic acid with bidistilled water.

General view of the mass spectrum in the 300-900 daltons range:

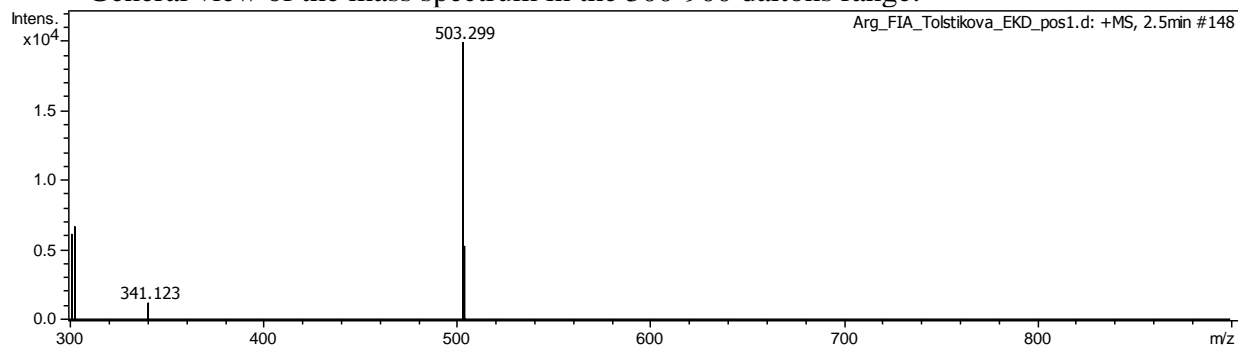

We see that the positive ions have no ion with  $m/z=481$  ( $(M+H)^+$ ), there is a peak with  $m/z=503$  - this is the peak of the cation  $(M+Na)^+$  and, additionally, there are isotopic peaks of the cluster.

Mass spectrum in the region of 505 daltons:

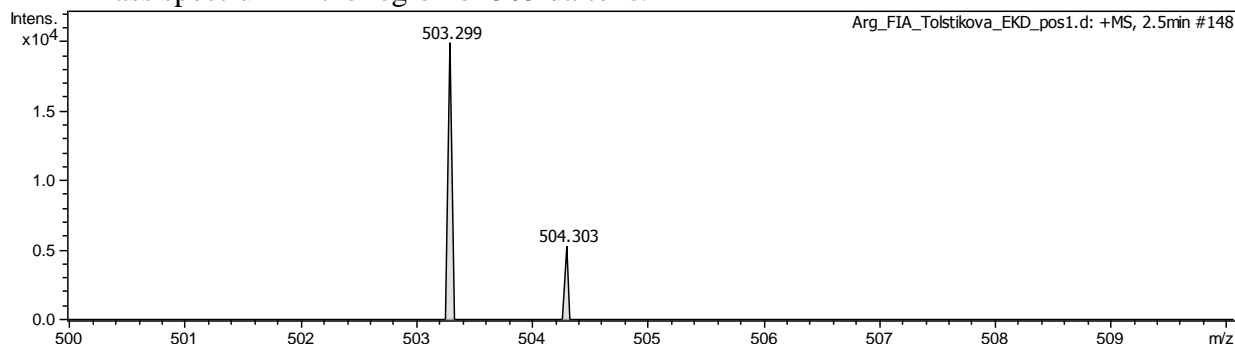

Simulation with  $C_{27}H_{44}O_7Na^+$ ,  $m/z=503$ , recorded mass spectrum above, simulation below:

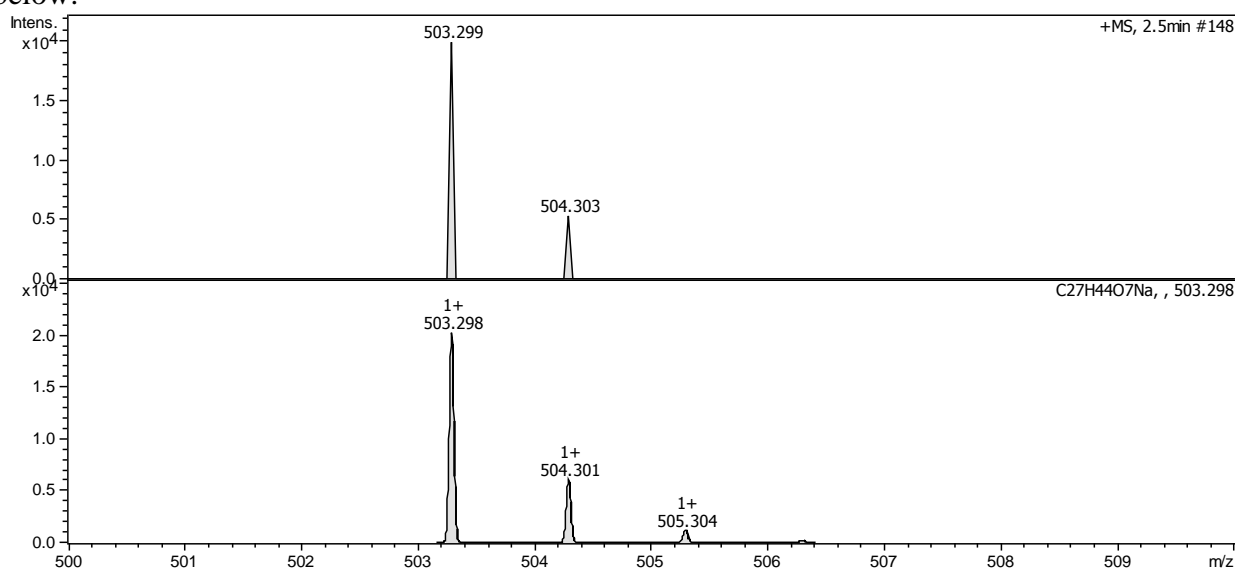

Thus: with an error of about 0.001 daltons (2.0 m.d.) this is the structure, according to the isotopic distribution also looks like it.

## 2.2. Leuzea extract sample

Mass spectra were recorded on a solution of 1 mg/cm<sup>3</sup> of the sample in ethyl alcohol, direct input mass spectrometry (without chromatographic separation) on a Bruker mi-crOTOFQ instrument, electrospray ionization (ESI) method, negative ion registration mode, calibration mixture - arginine solution in acidified formic acid with bidistilled water.

General view of the mass spectrum in the 300-900 daltons range:

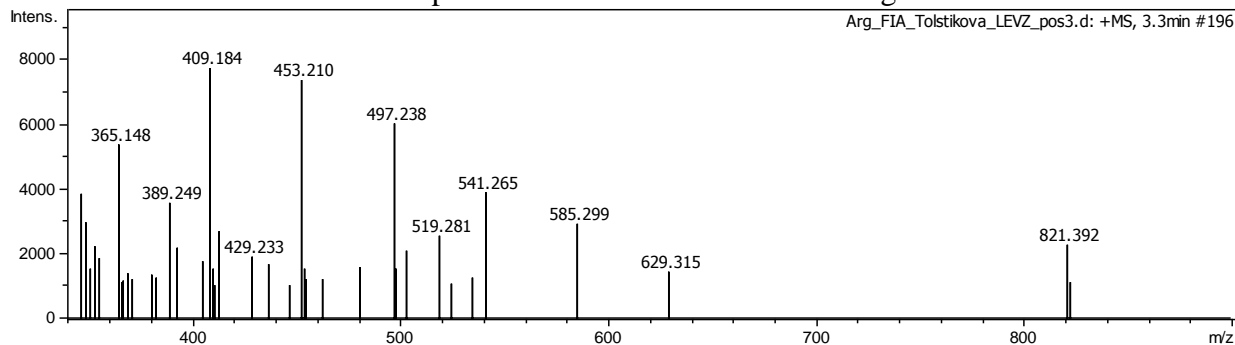

It can be seen that there is no ion with  $m/z=481$  ( $(M+H)^+$ ) in positive ions, there is a peak with  $m/z=503$  which is the peak of cation  $(M+Na)^+$ . But the substance in the sample is small - the intensity of the line is very low.

The mass spectrum is around 505 daltons:

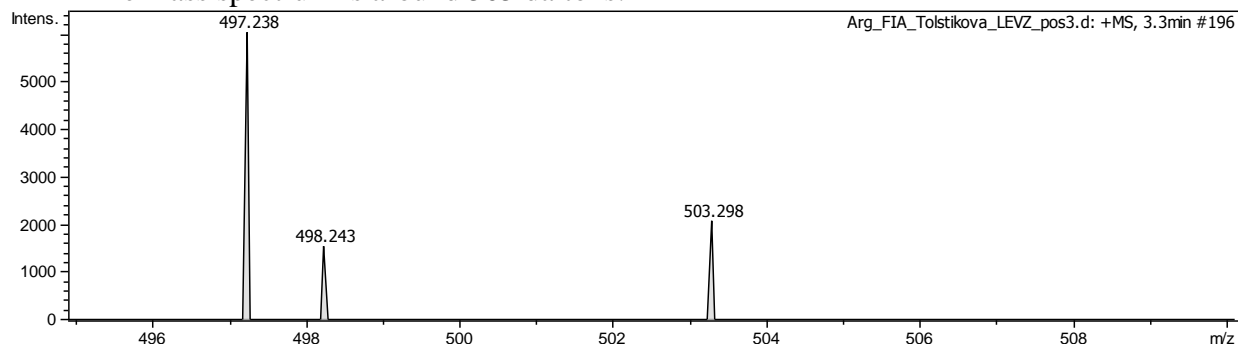

Simulation with  $C_{27}H_{44}O_7Na^+$ ,  $m/z=503$ , recorded mass spectrum above, simulation below:

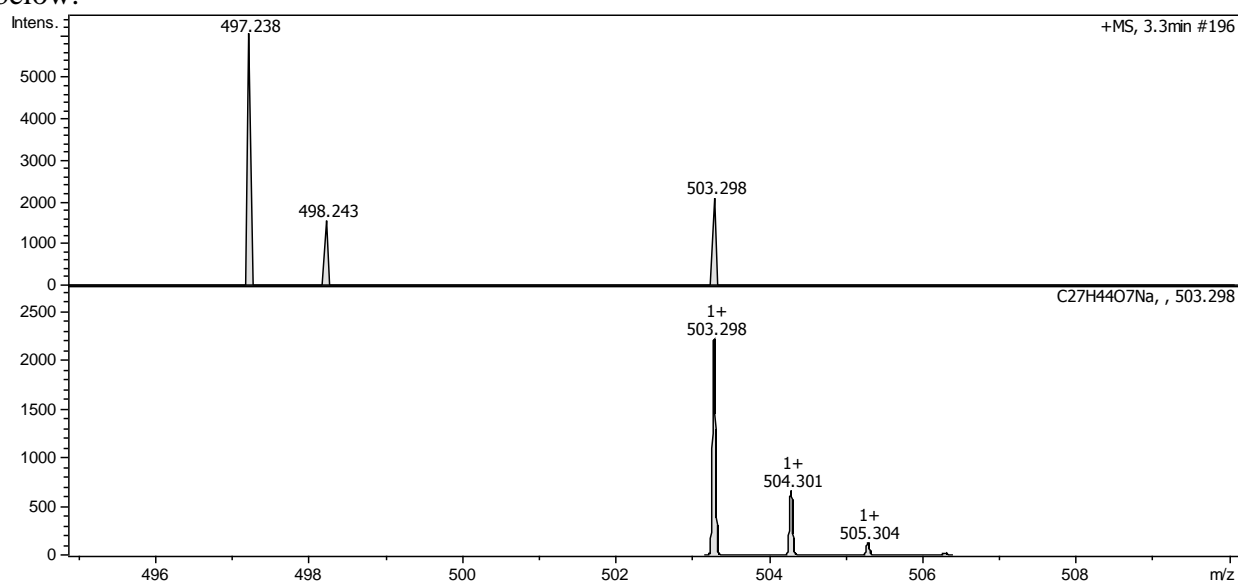

Thus: with an error of less than 0.001 daltons (less than 2.0 m.d.) this is that structure.
