# Supplementary material for: Effect of the Composition of Leuzea and Cranberry Meal Extracts on Metabolic Processes in Norm and Pathology
Source: Pharmaceuticals (Basel). 2023 May 19;16(5):768. doi: 10.3390/ph16050768 (PMC10221024; doi:10.3390/ph16050768)
Supplement: Supplementary file 1 [file pharmaceuticals-16-00768-s001.zip › File S3.pdf]

### PASPORT № 0510 of 27.05.2020

|                           |                       |                          |                          |
|---------------------------|-----------------------|--------------------------|--------------------------|
| <b>Product Name:</b>      | Leuzea extract (root) | <b>Botanical Source</b>  | Rhaponticum carthamoides |
| <b>Batch No.</b>          | 475                   | <b>Extractor</b>         | Water                    |
| <b>Batch Quantity, kg</b> | 23,49                 | <b>Manufacture Date:</b> | March 2020               |

| Item                                                                           | Specification                                                                                                | Method                          | Test result |
|--------------------------------------------------------------------------------|--------------------------------------------------------------------------------------------------------------|---------------------------------|-------------|
| Appearance                                                                     | Amorphous powder or granulate of light green or brown to dark color. Hygroscopic. Allowed caking (clumping). | Organoleptic                    | Conforms    |
| Odor & Taste                                                                   | Characteristic                                                                                               | Organoleptic                    | Conforms    |
| Humidity, %*                                                                   | NMT 8,0                                                                                                      | GOST 24027.2-80                 | 4,6         |
| Grinding degree                                                                | NMT 0,5 mm                                                                                                   | GOST 26573.3                    | Conforms    |
| Ecdystene content, %*                                                          | NLT 0,3                                                                                                      | M 4.1.1672-03                   | 0,3         |
| <b>Microbiological Control</b>                                                 |                                                                                                              |                                 |             |
| E.coli                                                                         | Not allowed in 1 g                                                                                           | GOST 30726-2001                 | Conforms    |
| S.aureus                                                                       | Not allowed in 0,1 g                                                                                         | GOST 31746-2012                 | Conforms    |
| Coliform bacteria (Klebsiella, Enterobacter, Citrobacter, and Hafnia)          | Not allowed in 0,1 g                                                                                         | GOST 31747-2012                 | Conforms    |
| Yeast & Mold, cfu/g                                                            | 1x10 <sup>2</sup>                                                                                            | GOST 10444.12-2013              | Conforms    |
| Number of mesophilic aerobic and facultatively anaerobic microorganisms, cfu/g | 5x10 <sup>4</sup>                                                                                            | GOST 10444.15-94, ISO 7218-2011 | Conforms    |
| Salmonella                                                                     | Not allowed in 10                                                                                            | GOST 31659-2012                 | Conforms    |
| Lead                                                                           | NMT 5,0                                                                                                      | GOST 31671-2012                 | Conforms    |
| Arsenic                                                                        | NMT 3,0                                                                                                      | GOST 31671-2012                 | Conforms    |
| Cadmium                                                                        | NMT 1,0                                                                                                      | GOST 31671-2012                 | Conforms    |
| Mercury                                                                        | NMT 1,0                                                                                                      | GOST M 54639-2011               | Conforms    |

|            |                                                                                                                                                  |
|------------|--------------------------------------------------------------------------------------------------------------------------------------------------|
| Storage    | In dry, well-ventilated and protected from direct sunlight rooms at a temperature not exceeding + 25 °C and relative humidity not exceeding 75%. |
| Shelf Life | 3 years under storage conditions                                                                                                                 |

**Conclusion:** Batch No.475 complies with the requirements of TS 9199-002-10015296-2014, mod 1, TR TS 021/2011 "On the safety of food products," TR TS 022/2011 "Food products with respect to its labeling" on the indicators tested.

**Note (\*):** Tests were conducted by a certified laboratory LLC "AIC TEST" (Biysk, №RA.RU.21AYU83), protocol of laboratory tests №1239 from 27.05.2020.

Зам.директора по качеству ООО «Экстракты Алтай»

А.П. Нестеров
