# Supplementary material for: Effect of the Composition of Leuzea and Cranberry Meal Extracts on Metabolic Processes in Norm and Pathology
Source: Pharmaceuticals (Basel). 2023 May 19;16(5):768. doi: 10.3390/ph16050768 (PMC10221024; doi:10.3390/ph16050768)
Supplement: Supplementary file 1 [file pharmaceuticals-16-00768-s001.zip › File S4.pdf]

**МИНОБРНАУКИ РОССИИ**  
**Федеральное государственное бюджетное учреждение науки**  
**Новосибирский институт органической химии им. Н.Н. Ворожцова**  
**Сибирского отделения Российской академии наук**  
просп. Академика Лаврентьева, д. 9, г. Новосибирск, 630090, Российская Федерация  
Тел. (383) 330-88-50, Факс: (383) 330-97-52 E-mail: [benzol@nioch.nsc.ru](mailto:benzol@nioch.nsc.ru)  
ОКПО 03533903, ОГРН 1025403651921, ИНН/КПП 5408100191/540801001

**PASSPORT**  
**CRANBERRY TRITERPENE ACID EXTRACT**

Batch No. 03-21

Lab. No. 2065

Manufacture Date: May 2021

Mass: 100 г.

Number of seats: 1

Regulatory document: ВФС 42-3616-00

| Item                                                               | Test result   |
|--------------------------------------------------------------------|---------------|
| 1. Appearance                                                      | Yellow powder |
| 2. Mass fraction of volatiles, %                                   | 3,3           |
| 3. Triterpene acids content (HPLC)<br>converted to ursolic acid, % | 40            |
| 4. Mass fraction of ash residue, %                                 | 0,2           |

**Microbiological Control \***

| Item                                                                    | Units of measure | Test result           | Specification        | Method                     |
|-------------------------------------------------------------------------|------------------|-----------------------|----------------------|----------------------------|
| Number of mesophilic aerobic and facultatively anaerobic microorganisms | cfu/g            | Less $5 \times 10^4$  | NMT $5 \times 10^4$  | GOST 10444.15              |
| Coliform bacteria (Klebsiella, Enterobacter, Citrobacter, and Hafnia)   | -                | Not detected in 0,1 g | Not allowed in 0,1 g | GOST 31747                 |
| E.coli                                                                  | -                | Not detected in 1,0 g | Not allowed in 0,1 g | GOST 30762                 |
| Salmonella                                                              | -                | Not detected in 25 g  | Not allowed in 25 g  | GOST 31659-(ИСО 6579:2002) |
| Yeast & Mold                                                            | cfu/g            | Less 10               | NMT 100              | GOST 10444.12              |

**Note (\*):** Microbiological control was carried out by the Test Laboratory of Biotechnological Control of Research Center Research and Production Firm LLC. Test protocol №83578505 of 18.05.2021.

**Shelf life:** 2 years if the storage conditions are observed

**Storage:** In dry, well-ventilated and protected from direct sunlight rooms at a temperature not exceeding + 25 °C and relative humidity not exceeding 75%.

**Conclusion:** Batch No.03-21 complies with the requirements of TS 9199-002-10015296-2014 "About food safety", TR TS 022/2011 "Food products and part of its labelling" according to the checked parameters.
